# Supplementary material for: Disease-driven reduction in human mobility influences human-mosquito contacts and dengue transmission dynamics
Source: PubMed Central journal article supplement (PMC7845972; doi:10.1371/journal.pcbi.1008627), 2021-01-19
Supplement: pcbi.1008627.s001.pdf [file pcbi.1008627.s001.pdf]

| Symbol        | Value | Definition                                                              |
|---------------|-------|-------------------------------------------------------------------------|
| T             | 200   | Number of time steps in simulation                                      |
| $\nu$         | 10    | Number of mosquito eggs per capita per feeding cycle                    |
| $ f $         | 600   | Number of houses                                                        |
| $ l $         | 600   | Number of aquatic habitats                                              |
| $\xi$         | 4     | Length of the larval stage (in feeding cycles)                          |
| $s_L$         | 0.9   | Mosquito survival between blood feeding (houses) and egg laying         |
| $s_F$         | 0.9   | Mosquito survival between egg laying and blood feeding (houses)         |
| $\sigma$      | 3     | Pathogen incubation period in hosts                                     |
| $\tau$        | 1     | Pathogen incubation period in mosquitoes                                |
| $\rho_{\max}$ | 5     | Maximum number of time steps for host infectiousness (I)                |
| $c_i$         |       | Host-to-mosquito transmission efficiency for infectiousness stage $I_i$ |
| $b$           | 0.75  | Mosquito-to-host transmission efficiency                                |
