# Supplementary material for: Disease-driven reduction in human mobility influences human-mosquito contacts and dengue transmission dynamics
Source: PubMed Central journal article supplement (PMC7845972; doi:10.1371/journal.pcbi.1008627), 2021-01-19
Supplement: pcbi.1008627.s002.pdf [file pcbi.1008627.s002.pdf]

| Symbol   | Definition                                                                    |
|----------|-------------------------------------------------------------------------------|
| $\alpha$ | Strength of density dependence on larval mosquitoes                           |
| Hh       | Number of hosts per house                                                     |
| $L$      | Probability of mosquito movement from house to larval site                    |
| $F$      | Probability of mosquito movement from larval site to house                    |
| $S_{mf}$ | Number of susceptible adult mosquitoes at each house                          |
| $S_{ml}$ | Number of susceptible adult mosquitoes at each larval site                    |
| $\rho_i$ | Probability of host recovery at each stage of infectiousness                  |
| $\gamma$ | Host biting suitability                                                       |
| $SN$     | Random presence/absence social network                                        |
| $HM$     | Houses each host will visit based on $SN$                                     |
| $H$      | Proportion of time each host spends at each household, based on $SN$ and $HM$ |
