# Supplementary material for: Disease-driven reduction in human mobility influences human-mosquito contacts and dengue transmission dynamics
Source: PubMed Central journal article supplement (PMC7845972; doi:10.1371/journal.pcbi.1008627), 2021-01-19
Supplement: pcbi.1008627.s003.pdf [file pcbi.1008627.s003.pdf]

| <b>Stage of infectiousness</b>                   | <b>S</b> | <b>I<sub>1</sub></b> | <b>I<sub>2</sub></b> | <b>I<sub>3</sub></b> | <b>I<sub>4</sub></b> | <b>I<sub>5</sub></b> |
|--------------------------------------------------|----------|----------------------|----------------------|----------------------|----------------------|----------------------|
| <b>Day of Symptoms</b>                           | ---      | Pre-symptomatic      | Days 1-3             | Days 4-6             | Days 7-9             | Days 10-12           |
| <b>Infectiousness</b>                            | ---      | 0.4                  | 0.7                  | 0.4                  | 0.1                  | 0.01                 |
| <b>Time at home (%)</b>                          | 50%      | 50%                  | 80%                  | 80%                  | 70%                  | 50%                  |
| <b>Fraction of original houses being visited</b> | 1        | 1                    | 1/3                  | 1/3                  | 2/3                  | 1                    |
