# Supplementary material for: Disease-driven reduction in human mobility influences human-mosquito contacts and dengue transmission dynamics
Source: PubMed Central journal article supplement (PMC7845972; doi:10.1371/journal.pcbi.1008627), 2021-01-19
Supplement: pcbi.1008627.s004.pdf [file pcbi.1008627.s004.pdf]

|                                                                                                                                                                                                | Total Onward Transmission Without Mobility Changes Included |               |                    |            |
|------------------------------------------------------------------------------------------------------------------------------------------------------------------------------------------------|-------------------------------------------------------------|---------------|--------------------|------------|
| Factors                                                                                                                                                                                        | Deviance Explained (%)                                      | df            | $\Delta$ AICc      | Weight     |
| Percent bites at home                                                                                                                                                                          | 0.53%                                                       | 10.915        | $4.33 \times 10^5$ | <0.001     |
| Number of mosquitoes at home                                                                                                                                                                   | 13.57%                                                      | 10.949        | $2.60 \times 10^5$ | <0.001     |
| Number of mosquitoes in activity space                                                                                                                                                         | 2.97%                                                       | 10.999        | $3.81 \times 10^5$ | <0.001     |
| Biting suitability score                                                                                                                                                                       | 37.69%                                                      | 10.973        | $4.23 \times 10^5$ | <0.001     |
| Biting suitability score,<br>Number of mosquitoes at home,<br>Number of mosquitoes in activity space,<br>Percent bites at home                                                                 | 64.60%                                                      | 37.925        | $5.06 \times 10^4$ | <0.001     |
| Biting suitability score,<br>Number of mosquitoes at home,<br>Number of mosquitoes in activity space,<br>Percent bites at home,<br>(Biting suitability score) X (Number of mosquitoes at home) | <b>69.13%</b>                                               | <b>52.782</b> | <b>0.0</b>         | <b>1.0</b> |
| Biting suitability score,<br>Number of mosquitoes at home,<br>Number of mosquitoes in activity space,<br>Percent bites at home,<br>(Biting suitability score) X (Percent bites at home)        | 65.40%                                                      | 53.754        | $4.22 \times 10^4$ | <0.001     |
| Biting suitability score,<br>Number of mosquitoes at home,<br>Number of mosquitoes in activity space,<br>Percent bites at home,<br>(Number of mosquitoes at home) X (Percent bites at home)    | 67.25%                                                      | 53.898        | $2.19 \times 10^4$ | <0.001     |
