# Supplementary material for: Disease-driven reduction in human mobility influences human-mosquito contacts and dengue transmission dynamics
Source: PubMed Central journal article supplement (PMC7845972; doi:10.1371/journal.pcbi.1008627), 2021-01-19
Supplement: pcbi.1008627.s005.pdf [file pcbi.1008627.s005.pdf]

|                                                                                                                                                        | Total Onward Transmission |               |                    |            | Onward Transmission from 1° bites at home |               |                    |            |
|--------------------------------------------------------------------------------------------------------------------------------------------------------|---------------------------|---------------|--------------------|------------|-------------------------------------------|---------------|--------------------|------------|
| Factors                                                                                                                                                | Deviance Explained (%)    | df            | $\Delta$ AICc      | Weight     | Deviance Explained (%)                    | df            | $\Delta$ AICc      | Weight     |
| Percent bites at home                                                                                                                                  | 9.30%                     | 10.965        | $4.74 \times 10^5$ | <0.001     | 28.66%                                    | 10.997        | $4.94 \times 10^5$ | <0.001     |
| Number of mosquitoes at home                                                                                                                           | 27.67%                    | 10.958        | $3.90 \times 10^5$ | <0.001     | 42.98%                                    | 10.974        | $4.11 \times 10^5$ | <0.001     |
| Biting suitability score                                                                                                                               | 32.29%                    | 10.952        | $3.65 \times 10^5$ | <0.001     | 20.02%                                    | 10.873        | $5.36 \times 10^5$ | <0.001     |
| Biting suitability score,<br>Number of mosquitoes at home,<br>Percent bites at home                                                                    | 67.11%                    | 28.819        | $9.78 \times 10^4$ | <0.001     | 69.44%                                    | 28.872        | $1.80 \times 10^5$ | <0.001     |
| Biting suitability score,<br>Number of mosquitoes at home,<br>Percent bites at home,<br>(Biting suitability score) X<br>(Number of mosquitoes at home) | <b>74.74%</b>             | <b>43.614</b> | <b>0.0</b>         | <b>1.0</b> | <b>81.19%</b>                             | <b>44.528</b> | <b>0.0</b>         | <b>1.0</b> |
| Biting suitability score,<br>Number of mosquitoes at home,<br>Percent bites at home,<br>(Biting suitability score) X<br>(Percent bites at home)        | 69.33%                    | 44.530        | $7.19 \times 10^4$ | <0.001     | 76.21%                                    | 44.737        | $8.70 \times 10^4$ | <0.001     |
| Biting suitability score,<br>Number of mosquitoes at home,<br>Percent bites at home,<br>(Number of mosquitoes at home)<br>X (Percent bites at home)    | 67.89%                    | 44.924        | $8.90 \times 10^4$ | <0.001     | 70.04%                                    | 44.207        | $1.73 \times 10^5$ | <0.001     |
