# Supplementary material for: Disease-driven reduction in human mobility influences human-mosquito contacts and dengue transmission dynamics
Source: PubMed Central journal article supplement (PMC7845972; doi:10.1371/journal.pcbi.1008627), 2021-01-19
Supplement: pcbi.1008627.s006.pdf [file pcbi.1008627.s006.pdf]

|                                                                                                                                            | Percent Change in Total Onward Transmission |        |                       |        | Percent Change in Onward Transmission from 1° bites at home |        |                       |        |
|--------------------------------------------------------------------------------------------------------------------------------------------|---------------------------------------------|--------|-----------------------|--------|-------------------------------------------------------------|--------|-----------------------|--------|
| Factors                                                                                                                                    | Deviance Explained (%)                      | df     | Δ AICc                | Weight | Deviance Explained (%)                                      | df     | Δ AICc                | Weight |
| Percent bites at home                                                                                                                      | 80.55%                                      | 10.999 | 6.37 x10 <sup>4</sup> | <0.001 | 40.24%                                                      | 10.999 | 9.63 x10 <sup>4</sup> | <0.001 |
| Number of mosquitoes at home                                                                                                               | 46.67%                                      | 10.960 | 4.38 x10 <sup>5</sup> | <0.001 | 4.78%                                                       | 10.810 | 2.70 x10 <sup>5</sup> | <0.001 |
| Biting suitability score                                                                                                                   | 2.49%                                       | 10.277 | 6.61 x10 <sup>5</sup> | <0.001 | 11.65%                                                      | 10.825 | 2.41 x10 <sup>5</sup> | <0.001 |
| Biting suitability score, Number of mosquitoes at home, Percent bites at home                                                              | 82.08%                                      | 28.646 | 3.34 x10 <sup>4</sup> | <0.001 | 52.63%                                                      | 28.846 | 1.03 x10 <sup>4</sup> | <0.001 |
| Biting suitability score, Number of mosquitoes at home, Percent bites at home, (Biting suitability score) X (Number of mosquitoes at home) | 82.91%                                      | 42.873 | 1.59 x10 <sup>4</sup> | <0.001 | 52.83%                                                      | 38.762 | 8.76 x10 <sup>3</sup> | <0.001 |
| Biting suitability score, Number of mosquitoes at home, Percent bites at home, (Biting suitability score) X (Percent bites at home)        | 83.63%                                      | 44.235 | 0.0                   | 1.0    | 53.93%                                                      | 44.231 | 0.0                   | 1.0    |
| Biting suitability score, Number of mosquitoes at home, Percent bites at home, (Number of mosquitoes at home) X (Percent bites at home)    | 82.22%                                      | 44.111 | 3.06 x10 <sup>4</sup> | <0.001 | 52.79%                                                      | 44.416 | 9.10 x10 <sup>3</sup> | <0.001 |
