# Supplementary material for: Disease-driven reduction in human mobility influences human-mosquito contacts and dengue transmission dynamics
Source: PubMed Central journal article supplement (PMC7845972; doi:10.1371/journal.pcbi.1008627), 2021-01-19
Supplement: pcbi.1008627.s008.pdf [file pcbi.1008627.s008.pdf]

|                                                                                                                                                        | Change in Expected Mosquito Contacts |        |                    |        | Percent Change in Expected Mosquito Contacts |        |                    |        |
|--------------------------------------------------------------------------------------------------------------------------------------------------------|--------------------------------------|--------|--------------------|--------|----------------------------------------------|--------|--------------------|--------|
| Factors                                                                                                                                                | Deviance Explained (%)               | df     | $\Delta$ AICc      | Weight | Deviance Explained (%)                       | df     | $\Delta$ AICc      | Weight |
| Percent bites at home                                                                                                                                  | 24.58%                               | 10.998 | $1.28 \times 10^5$ | <0.001 | 92.08%                                       | 11.000 | $6.63 \times 10^4$ | <0.001 |
| Number of mosquitoes at home                                                                                                                           | 8.53%                                | 10.053 | $1.99 \times 10^5$ | <0.001 | 53.82%                                       | 10.958 | $7.17 \times 10^5$ | <0.001 |
| Biting suitability score                                                                                                                               | 7.20%                                | 10.956 | $2.04 \times 10^5$ | <0.001 | 1.66%                                        | 10.141 | $9.95 \times 10^5$ | <0.001 |
| Biting suitability score,<br>Number of mosquitoes at home,<br>Percent bites at home                                                                    | 37.17%                               | 28.962 | $6.06 \times 10^4$ | <0.001 | 92.97%                                       | 28.646 | $2.23 \times 10^4$ | <0.001 |
| Biting suitability score,<br>Number of mosquitoes at home,<br>Percent bites at home,<br>(Biting suitability score) X<br>(Number of mosquitoes at home) | 39.72%                               | 42.620 | $4.53 \times 10^4$ | <0.001 | 93.16%                                       | 43.992 | $1.20 \times 10^4$ | <0.001 |
| Biting suitability score,<br>Number of mosquitoes at home,<br>Percent bites at home,<br>(Biting suitability score) X<br>(Percent bites at home)        | 46.37%                               | 44.832 | $2.18 \times 10^3$ | <0.001 | 93.38%                                       | 44.317 | 0.0                | 1.0    |
| Biting suitability score,<br>Number of mosquitoes at home,<br>Percent bites at home,<br>(Number of mosquitoes at home)<br>X (Percent bites at home)    | 46.69%                               | 44.778 | 0.0                | 1.0    | 93.02%                                       | 43.086 | $1.98 \times 10^4$ | <0.001 |
