# Supplementary material for: Disease-driven reduction in human mobility influences human-mosquito contacts and dengue transmission dynamics
Source: PubMed Central journal article supplement (PMC7845972; doi:10.1371/journal.pcbi.1008627), 2021-01-19
Supplement: pcbi.1008627.s009.pdf [file pcbi.1008627.s009.pdf]

|                                          | Mean (sd) Onward Transmission |                       | Mean (sd) Change in Onward Transmission with Movement Changes |                          |
|------------------------------------------|-------------------------------|-----------------------|---------------------------------------------------------------|--------------------------|
|                                          | $R_{\text{norm}}$             | $R_{\text{movement}}$ | $R_{\text{abs\_change}}$                                      | $R_{\text{rel\_change}}$ |
| 1° bites at home                         | 3.3 (3.3)                     | 4.4 (4.2)             | 1.0 (1.1)                                                     | 38.8 (21.0)              |
| 1° bites at other houses                 | 3.1 (3.1)                     | 1.2 (1.2)             | -1.9 (1.9)                                                    | -62.3 (8.8)              |
| 2° bites at infectious individual's home | 0.3 (0.4)                     | 0.5 (0.6)             | 0.0 (0.1)                                                     | 31.86 (35.59)            |
| 2° bites elsewhere                       | 4.6 (4.3)                     | 5.5 (4.3)             | -0.6 (1.8)                                                    | -17.1 (28.97)            |
| Total                                    | 7.2 (5.5)                     | 6.0 (4.8)             | -1.1 (2.4)                                                    | -15.3 (29.2)             |
