# Supplementary material for: Disease-driven reduction in human mobility influences human-mosquito contacts and dengue transmission dynamics
Source: PubMed Central journal article supplement (PMC7845972; doi:10.1371/journal.pcbi.1008627), 2021-01-19
Supplement: pcbi.1008627.s010.pdf [file pcbi.1008627.s010.pdf]

|                                                                                                                                                                                                | Total Onward Transmission Without Mobility Changes Included |               |                    |            |
|------------------------------------------------------------------------------------------------------------------------------------------------------------------------------------------------|-------------------------------------------------------------|---------------|--------------------|------------|
| Factors                                                                                                                                                                                        | Deviance Explained (%)                                      | df            | $\Delta$ AICc      | Weight     |
| Percent bites at home                                                                                                                                                                          | 1.11%                                                       | 10.849        | $4.10 \times 10^5$ | <0.001     |
| Number of mosquitoes at home                                                                                                                                                                   | 14.12%                                                      | 10.976        | $3.65 \times 10^5$ | <0.001     |
| Number of mosquitoes in activity space                                                                                                                                                         | 2.78%                                                       | 10.694        | $4.05 \times 10^5$ | <0.001     |
| Biting suitability score                                                                                                                                                                       | 41.31%                                                      | 10.969        | $2.43 \times 10^5$ | <0.001     |
| Biting suitability score,<br>Number of mosquitoes at home,<br>Number of mosquitoes in activity space,<br>Percent bites at home                                                                 | 67.43%                                                      | 37.909        | $5.45 \times 10^4$ | <0.001     |
| Biting suitability score,<br>Number of mosquitoes at home,<br>Number of mosquitoes in activity space,<br>Percent bites at home,<br>(Biting suitability score) X (Number of mosquitoes at home) | <b>72.53%</b>                                               | <b>52.877</b> | <b>0.0</b>         | <b>1.0</b> |
| Biting suitability score,<br>Number of mosquitoes at home,<br>Number of mosquitoes in activity space,<br>Percent bites at home,<br>(Biting suitability score) X (Percent bites at home)        | 68.56%                                                      | 53.765        | $4.32 \times 10^4$ | <0.001     |
| Biting suitability score,<br>Number of mosquitoes at home,<br>Number of mosquitoes in activity space,<br>Percent bites at home,<br>(Number of mosquitoes at home) X (Percent bites at home)    | 69.26%                                                      | 53.764        | $3.60 \times 10^4$ | <0.001     |
