# Supplementary material for: Disease-driven reduction in human mobility influences human-mosquito contacts and dengue transmission dynamics
Source: PubMed Central journal article supplement (PMC7845972; doi:10.1371/journal.pcbi.1008627), 2021-01-19
Supplement: pcbi.1008627.s011.pdf [file pcbi.1008627.s011.pdf]

|                                                                                                                                                        | Total Onward Transmission |               |                       |            | Onward Transmission from 1° bites at home |               |                       |            |
|--------------------------------------------------------------------------------------------------------------------------------------------------------|---------------------------|---------------|-----------------------|------------|-------------------------------------------|---------------|-----------------------|------------|
| Factors                                                                                                                                                | Deviance Explained (%)    | df            | Δ AICc                | Weight     | Deviance Explained (%)                    | df            | Δ AICc                | Weight     |
| Percent bites at home                                                                                                                                  | 10.57%                    | 10.863        | 1.35 x10 <sup>5</sup> | <0.001     | 29.22%                                    | 10.924        | 1.38 x10 <sup>5</sup> | <0.001     |
| Number of mosquitoes at home                                                                                                                           | 29.11%                    | 10.784        | 1.13 x10 <sup>5</sup> | <0.001     | 43.93%                                    | 10.841        | 1.15 x10 <sup>5</sup> | <0.001     |
| Biting suitability score                                                                                                                               | 34.15%                    | 10.823        | 1.05 x10 <sup>5</sup> | <0.001     | 20.96%                                    | 10.156        | 1.48 x10 <sup>5</sup> | <0.001     |
| Biting suitability score,<br>Number of mosquitoes at home,<br>Percent bites at home                                                                    | 70.12%                    | 28.580        | 2.99 x10 <sup>4</sup> | <0.001     | 71.25%                                    | 28.480        | 5.15 x10 <sup>4</sup> | <0.001     |
| Biting suitability score,<br>Number of mosquitoes at home,<br>Percent bites at home,<br>(Biting suitability score) X<br>(Number of mosquitoes at home) | <b>78.15%</b>             | <b>41.359</b> | <b>0.0</b>            | <b>1.0</b> | <b>83.20%</b>                             | <b>42.973</b> | <b>0.0</b>            | <b>1.0</b> |
| Biting suitability score,<br>Number of mosquitoes at home,<br>Percent bites at home,<br>(Biting suitability score) X<br>(Percent bites at home)        | 72.73%                    | 43.812        | 2.12 x10 <sup>4</sup> | <0.001     | 78.19%                                    | 44.119        | 2.50 x10 <sup>4</sup> | <0.001     |
| Biting suitability score,<br>Number of mosquitoes at home,<br>Percent bites at home,<br>(Number of mosquitoes at home)<br>X (Percent bites at home)    | 70.63%                    | 44.508        | 2.83 x10 <sup>4</sup> | <0.001     | 71.75%                                    | 41.929        | 4.97 x10 <sup>4</sup> | <0.001     |
