# Supplementary material for: Disease-driven reduction in human mobility influences human-mosquito contacts and dengue transmission dynamics
Source: PubMed Central journal article supplement (PMC7845972; doi:10.1371/journal.pcbi.1008627), 2021-01-19
Supplement: pcbi.1008627.s012.pdf [file pcbi.1008627.s012.pdf]

|                                                                                                                                            | Percent Change in Total Onward Transmission |               |                       |            | Percent Change in Onward Transmission from 1° bites at home |               |                       |            |
|--------------------------------------------------------------------------------------------------------------------------------------------|---------------------------------------------|---------------|-----------------------|------------|-------------------------------------------------------------|---------------|-----------------------|------------|
| Factors                                                                                                                                    | Deviance Explained (%)                      | df            | Δ AICc                | Weight     | Deviance Explained (%)                                      | df            | Δ AICc                | Weight     |
| Percent bites at home                                                                                                                      | 82.38%                                      | 10.999        | 1.78 x10 <sup>4</sup> | <0.001     | 44.05%                                                      | 10.995        | 2.96 x10 <sup>4</sup> | <0.001     |
| Number of mosquitoes at home                                                                                                               | 49.45%                                      | 10.956        | 1.19 x10 <sup>5</sup> | <0.001     | 4.84%                                                       | 10.422        | 8.04 x10 <sup>4</sup> | <0.001     |
| Biting suitability score                                                                                                                   | 2.50%                                       | 7.769         | 1.81 x10 <sup>5</sup> | <0.001     | 12.48%                                                      | 9.630         | 7.24 x10 <sup>4</sup> | <0.001     |
| Biting suitability score, Number of mosquitoes at home, Percent bites at home                                                              | 83.83%                                      | 25.628        | 9.56 x10 <sup>3</sup> | <0.001     | 57.44%                                                      | 28.521        | 3.44 x10 <sup>3</sup> | <0.001     |
| Biting suitability score, Number of mosquitoes at home, Percent bites at home, (Biting suitability score) X (Number of mosquitoes at home) | 84.60%                                      | 38.348        | 4.95 x10 <sup>3</sup> | <0.001     | 57.58%                                                      | 35.900        | 3.14 x10 <sup>3</sup> | <0.001     |
| Biting suitability score, Number of mosquitoes at home, Percent bites at home, (Biting suitability score) X (Percent bites at home)        | <b>85.38%</b>                               | <b>41.127</b> | <b>0.0</b>            | <b>1.0</b> | <b>58.95%</b>                                               | <b>41.963</b> | <b>0.0</b>            | <b>1.0</b> |
| Biting suitability score, Number of mosquitoes at home, Percent bites at home, (Number of mosquitoes at home) X (Percent bites at home)    | 84.04%                                      | 39.580        | 8.36 x10 <sup>3</sup> | <0.001     | 57.57%                                                      | 42.877        | 3.16 x10 <sup>3</sup> | <0.001     |
