# Supplementary material for: Disease-driven reduction in human mobility influences human-mosquito contacts and dengue transmission dynamics
Source: PubMed Central journal article supplement (PMC7845972; doi:10.1371/journal.pcbi.1008627), 2021-01-19
Supplement: pcbi.1008627.s014.pdf [file pcbi.1008627.s014.pdf]

|                              | Top 20% bites pre-exposure         |                                            | Bottom 80% bites pre-exposure      |                                            |
|------------------------------|------------------------------------|--------------------------------------------|------------------------------------|--------------------------------------------|
|                              | Mean (sd) change in expected bites | Mean (sd) percent change in expected bites | Mean (sd) change in expected bites | Mean (sd) percent change in expected bites |
| Days 1-3 after symptom Onset | -0.8 (3.6)                         | -12.6 (47.2)                               | -0.2 (0.7)                         | -17.3 (49.9)                               |
| Days 4-6 after symptom Onset | -0.3 (2.5)                         | -5.9 (35.5)                                | -0.1 (0.5)                         | -9.0 (36.9)                                |
| Days 7-9 after symptom Onset | -0.09 (1.5)                        | -2.0 (20.7)                                | -0.05 (0.3)                        | -5.0 (22.5)                                |
