# Supplementary material for: Disease-driven reduction in human mobility influences human-mosquito contacts and dengue transmission dynamics
Source: PubMed Central journal article supplement (PMC7845972; doi:10.1371/journal.pcbi.1008627), 2021-01-19
Supplement: pcbi.1008627.s015.pdf [file pcbi.1008627.s015.pdf]

|                                                                                                                                                        | Change in Expected Mosquito Contacts |        |                    |        | Percent Change in Expected Mosquito Contacts |        |                    |        |
|--------------------------------------------------------------------------------------------------------------------------------------------------------|--------------------------------------|--------|--------------------|--------|----------------------------------------------|--------|--------------------|--------|
| Factors                                                                                                                                                | Deviance Explained (%)               | df     | $\Delta$ AICc      | Weight | Deviance Explained (%)                       | df     | $\Delta$ AICc      | Weight |
| Percent bites at home                                                                                                                                  | 23.54%                               | 10.962 | $3.48 \times 10^4$ | <0.001 | 93.59%                                       | 11.000 | $2.02 \times 10^4$ | <0.001 |
| Number of mosquitoes at home                                                                                                                           | 8.31%                                | 10.402 | $5.21 \times 10^4$ | <0.001 | 56.03%                                       | 10.951 | $2.04 \times 10^5$ | <0.001 |
| Biting suitability score                                                                                                                               | 7.38%                                | 10.886 | $5.30 \times 10^4$ | <0.001 | 1.71%                                        | 8.392  | $2.80 \times 10^5$ | <0.001 |
| Biting suitability score,<br>Number of mosquitoes at home,<br>Percent bites at home                                                                    | 36.54%                               | 28.872 | $1.71 \times 10^4$ | <0.001 | 94.43%                                       | 25.907 | $6.86 \times 10^3$ | <0.001 |
| Biting suitability score,<br>Number of mosquitoes at home,<br>Percent bites at home,<br>(Biting suitability score) X<br>(Number of mosquitoes at home) | 39.14%                               | 40.747 | $1.31 \times 10^4$ | <0.001 | 94.60%                                       | 39.624 | $4.01 \times 10^3$ | <0.001 |
| Biting suitability score,<br>Number of mosquitoes at home,<br>Percent bites at home,<br>(Biting suitability score) X<br>(Percent bites at home)        | 45.56%                               | 44.163 | $2.49 \times 10^3$ | <0.001 | 94.82%                                       | 41.467 | 0.0                | 1.0    |
| Biting suitability score,<br>Number of mosquitoes at home,<br>Percent bites at home,<br>(Number of mosquitoes at home)<br>X (Percent bites at home)    | 46.96%                               | 44.717 | 0.0                | 1.0    | 94.47%                                       | 39.000 | $6.25 \times 10^3$ | <0.001 |
