# Supplementary material for: Disease-driven reduction in human mobility influences human-mosquito contacts and dengue transmission dynamics
Source: PubMed Central journal article supplement (PMC7845972; doi:10.1371/journal.pcbi.1008627), 2021-01-19
Supplement: pcbi.1008627.s018.pdf [file pcbi.1008627.s018.pdf]

|                                                                                                                                                        | Total Onward Transmission |               |                       |            | Onward Transmission from 1° bites at home |               |                       |            |
|--------------------------------------------------------------------------------------------------------------------------------------------------------|---------------------------|---------------|-----------------------|------------|-------------------------------------------|---------------|-----------------------|------------|
| Factors                                                                                                                                                | Deviance Explained (%)    | df            | Δ AICc                | Weight     | Deviance Explained (%)                    | df            | Δ AICc                | Weight     |
| Percent bites at home                                                                                                                                  | 7.77%                     | 10.979        | 4.33 x10 <sup>5</sup> | <0.001     | 28.42%                                    | 10.990        | 4.59 x10 <sup>5</sup> | <0.001     |
| Number of mosquitoes at home                                                                                                                           | 25.59%                    | 9.995         | 3.59 x10 <sup>5</sup> | <0.001     | 43.45%                                    | 10.999        | 3.78 x10 <sup>5</sup> | <0.001     |
| Biting suitability score                                                                                                                               | 34.44%                    | 10.968        | 3.16 x10 <sup>5</sup> | <0.001     | 19.36%                                    | 15.398        | 5.00 x10 <sup>5</sup> | <0.001     |
| Biting suitability score,<br>Number of mosquitoes at home,<br>Percent bites at home                                                                    | 66.73%                    | 27.719        | 8.26 x10 <sup>4</sup> | <0.001     | 69.83%                                    | 38.881        | 1.62 x10 <sup>5</sup> | <0.001     |
| Biting suitability score,<br>Number of mosquitoes at home,<br>Percent bites at home,<br>(Biting suitability score) X<br>(Number of mosquitoes at home) | <b>73.85%</b>             | <b>43.543</b> | <b>0.0</b>            | <b>1.0</b> | <b>81.17%</b>                             | <b>44.806</b> | <b>0.0</b>            | <b>1.0</b> |
| Biting suitability score,<br>Number of mosquitoes at home,<br>Percent bites at home,<br>(Biting suitability score) X<br>(Percent bites at home)        | 68.79%                    | 43.584        | 6.07 x10 <sup>4</sup> | <0.001     | 76.14%                                    | 44.829        | 8.13 x10 <sup>4</sup> | <0.001     |
| Biting suitability score,<br>Number of mosquitoes at home,<br>Percent bites at home,<br>(Number of mosquitoes at home)<br>X (Percent bites at home)    | 67.17%                    | 43.778        | 7.82 x10 <sup>4</sup> | <0.001     | 70.28%                                    | 42.240        | 1.57 x10 <sup>5</sup> | <0.001     |
