# Supplementary material for: Disease-driven reduction in human mobility influences human-mosquito contacts and dengue transmission dynamics
Source: PubMed Central journal article supplement (PMC7845972; doi:10.1371/journal.pcbi.1008627), 2021-01-19
Supplement: pcbi.1008627.s019.pdf [file pcbi.1008627.s019.pdf]

|                                                                                                                                            | Percent Change in Total Onward Transmission |               |                    |            | Percent Change in Onward Transmission from 1° bites at home |               |                    |            |
|--------------------------------------------------------------------------------------------------------------------------------------------|---------------------------------------------|---------------|--------------------|------------|-------------------------------------------------------------|---------------|--------------------|------------|
| Factors                                                                                                                                    | Deviance Explained (%)                      | df            | $\Delta$ AICc      | Weight     | Deviance Explained (%)                                      | df            | $\Delta$ AICc      | Weight     |
| Percent bites at home                                                                                                                      | 60.66%                                      | 10.998        | $2.16 \times 10^4$ | <0.001     | 31.08%                                                      | 10.998        | $5.40 \times 10^4$ | <0.001     |
| Number of mosquitoes at home                                                                                                               | 34.98%                                      | 10.973        | $1.94 \times 10^5$ | <0.001     | 3.48%                                                       | 10.778        | $1.70 \times 10^5$ | <0.001     |
| Biting suitability score                                                                                                                   | 2.25%                                       | 9.434         | $3.34 \times 10^5$ | <0.001     | 8.41%                                                       | 10.692        | $1.52 \times 10^5$ | <0.001     |
| Biting suitability score, Number of mosquitoes at home, Percent bites at home                                                              | 61.94%                                      | 27.354        | $1.02 \times 10^4$ | <0.001     | 40.24%                                                      | 28.810        | $5.00 \times 10^3$ | <0.001     |
| Biting suitability score, Number of mosquitoes at home, Percent bites at home, (Biting suitability score) X (Number of mosquitoes at home) | 62.56%                                      | 40.085        | $4.60 \times 10^3$ | <0.001     | 40.39%                                                      | 39.313        | $4.14 \times 10^3$ | <0.001     |
| Biting suitability score, Number of mosquitoes at home, Percent bites at home, (Biting suitability score) X (Percent bites at home)        | <b>63.06%</b>                               | <b>42.407</b> | <b>0.0</b>         | <b>1.0</b> | <b>41.11%</b>                                               | <b>43.485</b> | <b>0.0</b>         | <b>1.0</b> |
| Biting suitability score, Number of mosquitoes at home, Percent bites at home, (Number of mosquitoes at home) X (Percent bites at home)    | 62.06%                                      | 32.323        | $9.19 \times 10^3$ | <0.001     | 40.51%                                                      | 42.627        | $3.50 \times 10^3$ | <0.001     |
