# Supplementary material for: Disease-driven reduction in human mobility influences human-mosquito contacts and dengue transmission dynamics
Source: PubMed Central journal article supplement (PMC7845972; doi:10.1371/journal.pcbi.1008627), 2021-01-19
Supplement: pcbi.1008627.s020.pdf [file pcbi.1008627.s020.pdf]

|                                | Top 20% bites pre-exposure | Bottom 80% bites pre-exposure |
|--------------------------------|----------------------------|-------------------------------|
| Pre-exposure                   | 6.5 (2.7)                  | 1.5 (1.0)                     |
| Days 1-3 after symptom Onset   | 5.9 (3.4)                  | 1.2 (1.0)                     |
| Days 4-6 after symptom Onset   | 5.9 (3.4)                  | 1.2 (1.0)                     |
| Days 7-9 after symptom Onset   | 6.3 (3.0)                  | 1.3 (1.0)                     |
| Days 10-12 after symptom Onset | 6.6 (2.7)                  | 1.5 (1.0)                     |
