# Supplementary material for: Disease-driven reduction in human mobility influences human-mosquito contacts and dengue transmission dynamics
Source: PubMed Central journal article supplement (PMC7845972; doi:10.1371/journal.pcbi.1008627), 2021-01-19
Supplement: pcbi.1008627.s021.pdf [file pcbi.1008627.s021.pdf]

|                              | Top 20% bites pre-exposure         |                                            | Bottom 80% bites pre-exposure      |                                            |
|------------------------------|------------------------------------|--------------------------------------------|------------------------------------|--------------------------------------------|
|                              | Mean (sd) change in expected bites | Mean (sd) percent change in expected bites | Mean (sd) change in expected bites | Mean (sd) percent change in expected bites |
| Days 1-3 after symptom Onset | -0.2 (2.2)                         | -5.2 (35.6)                                | -0.1 (0.4)                         | -8.5 (36.6)                                |
| Days 4-6 after symptom Onset | -0.2 (2.3)                         | -5.1 (35.7)                                | -0.1 (0.4)                         | -8.4 (36.6)                                |
| Days 7-9 after symptom Onset | -0.04 (1.4)                        | -1.5 (21.4)                                | -0.05 (0.3)                        | -4.8 (22.2)                                |
