# Supplementary material for: Disease-driven reduction in human mobility influences human-mosquito contacts and dengue transmission dynamics
Source: PubMed Central journal article supplement (PMC7845972; doi:10.1371/journal.pcbi.1008627), 2021-01-19
Supplement: pcbi.1008627.s022.pdf [file pcbi.1008627.s022.pdf]

|                                                                                                                                                        | Change in Expected Mosquito Contacts |        |                    |        | Percent Change in Expected Mosquito Contacts |        |                    |        |
|--------------------------------------------------------------------------------------------------------------------------------------------------------|--------------------------------------|--------|--------------------|--------|----------------------------------------------|--------|--------------------|--------|
| Factors                                                                                                                                                | Deviance Explained (%)               | df     | $\Delta$ AICc      | Weight | Deviance Explained (%)                       | df     | $\Delta$ AICc      | Weight |
| Percent bites at home                                                                                                                                  | 25.65%                               | 10.997 | $8.81 \times 10^4$ | <0.001 | 68.69%                                       | 10.999 | $8.68 \times 10^3$ | <0.001 |
| Number of mosquitoes at home                                                                                                                           | 12.47%                               | 10.382 | $1.44 \times 10^5$ | <0.001 | 40.05%                                       | 10.963 | $2.31 \times 10^5$ | <0.001 |
| Biting suitability score                                                                                                                               | 5.25%                                | 10.950 | $1.71 \times 10^5$ | <0.001 | 1.31%                                        | 9.582  | $4.01 \times 10^5$ | <0.001 |
| Biting suitability score,<br>Number of mosquitoes at home,<br>Percent bites at home                                                                    | 33.66%                               | 28.939 | $4.91 \times 10^4$ | <0.001 | 69.24%                                       | 22.159 | $2.67 \times 10^3$ | <0.001 |
| Biting suitability score,<br>Number of mosquitoes at home,<br>Percent bites at home,<br>(Biting suitability score) X<br>(Number of mosquitoes at home) | 37.34%                               | 43.066 | $2.96 \times 10^4$ | <0.001 | 69.35%                                       | 31.732 | $1.45 \times 10^3$ | <0.001 |
| Biting suitability score,<br>Number of mosquitoes at home,<br>Percent bites at home,<br>(Biting suitability score) X<br>(Percent bites at home)        | 42.54%                               | 44.852 | 0.0                | 1.0    | 69.48%                                       | 36.984 | 0.0                | 1.0    |
| Biting suitability score,<br>Number of mosquitoes at home,<br>Percent bites at home,<br>(Number of mosquitoes at home)<br>X (Percent bites at home)    | 38.81%                               | 44.058 | $2.15 \times 10^4$ | <0.001 | 69.34%                                       | 39.735 | $1.59 \times 10^3$ | <0.001 |
