# Supplementary material for: Disease-driven reduction in human mobility influences human-mosquito contacts and dengue transmission dynamics
Source: PubMed Central journal article supplement (PMC7845972; doi:10.1371/journal.pcbi.1008627), 2021-01-19
Supplement: pcbi.1008627.s023.pdf [file pcbi.1008627.s023.pdf]

$$\mathbf{A} \quad S(t+1) = \text{Bernoulli}\left(S(t), (1-b) \sum_{U \in \mathcal{U}} \text{Multinomial}(I(t), U)\right)$$

$$E_0(t+1) = S(t) - S(t+1)$$

$$E_e(t+1) = E_{e-1}(t)$$

$$I_0(t+1) = E_{\sigma-1}(t)$$

$$I_i(t+1) = \text{Bernoulli}(I_{i-1}(t), 1 - \rho_{\text{fail}}(i-1))$$

$$R(t+1) = R(t) + \left(\sum I_i(t) + E_{\sigma-1}(t) - \sum I_i(t+1)\right)$$

$$\mathbf{B} \quad S'(t+1) = \text{Multinomial}(A_{\xi}(t+1), F) \\ + \text{Multinomial}(S''(t), LF)$$

$$S''(t+1) = S'(t+1)$$

$$- \text{Binomial}(\text{Multinomial}(S'(t+1), U), cI(t))$$

$$E'_0(t+1) = S'(t+1) - S''(t+1)$$

$$E'_e(t+1) = \text{Multinomial}(E'_{e-1}(t), LF)$$

$$I'(t+1) = \text{Multinomial}(I'(t) + E'_{\tau-1}(t), LF)$$
