# Supplementary material for: Disease-driven reduction in human mobility influences human-mosquito contacts and dengue transmission dynamics
Source: PubMed Central journal article supplement (PMC7845972; doi:10.1371/journal.pcbi.1008627), 2021-01-19

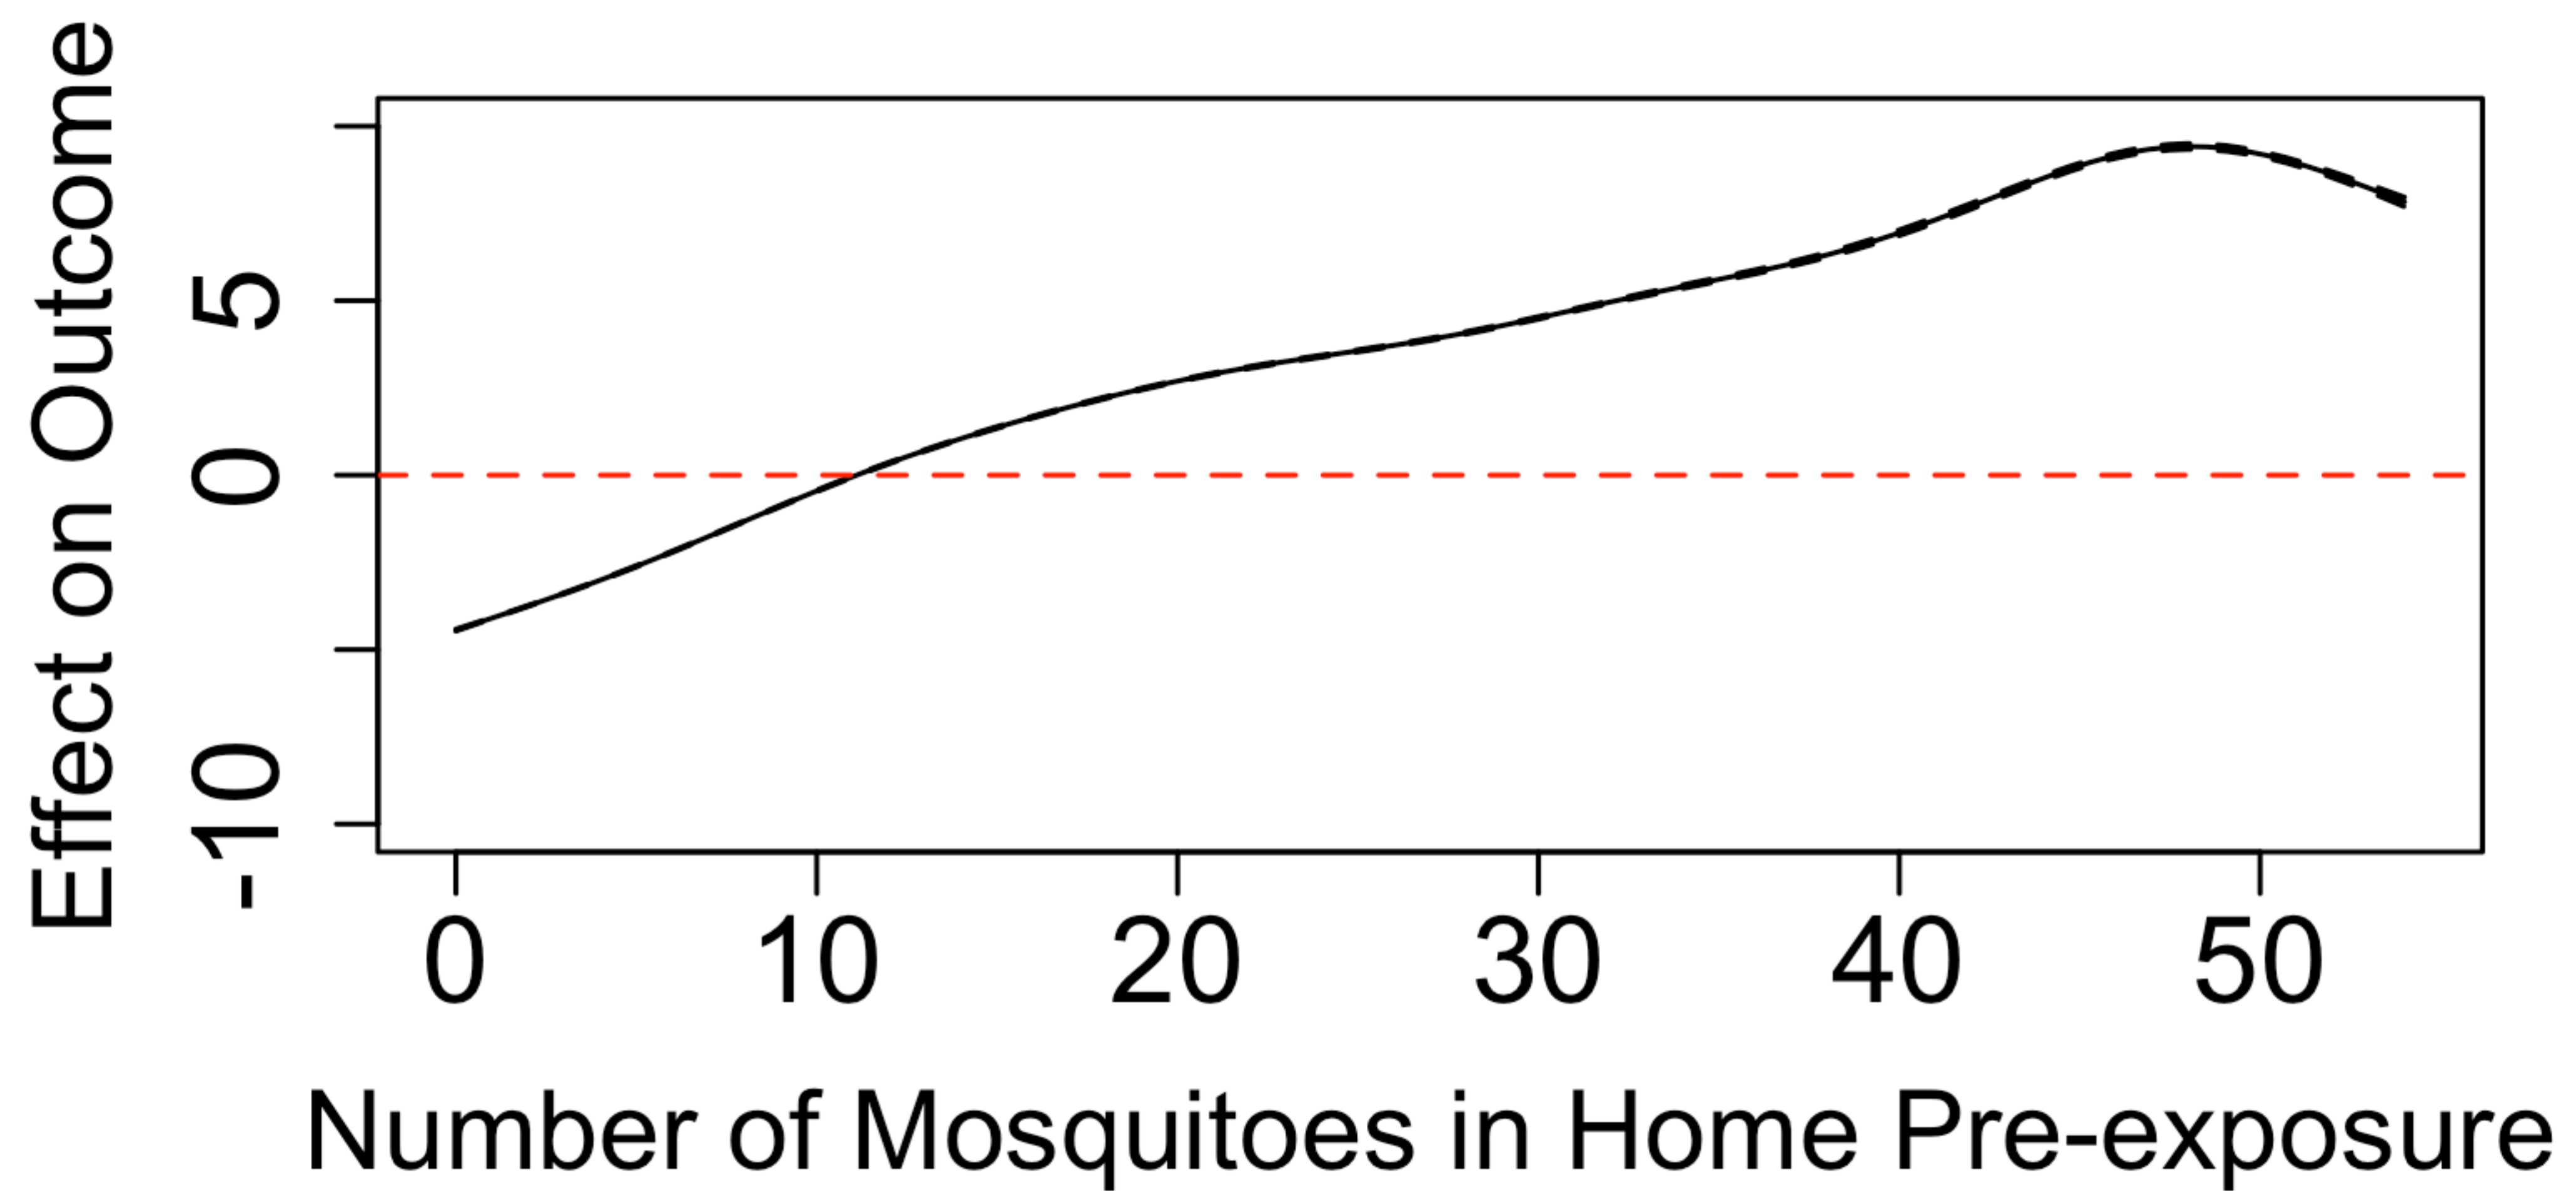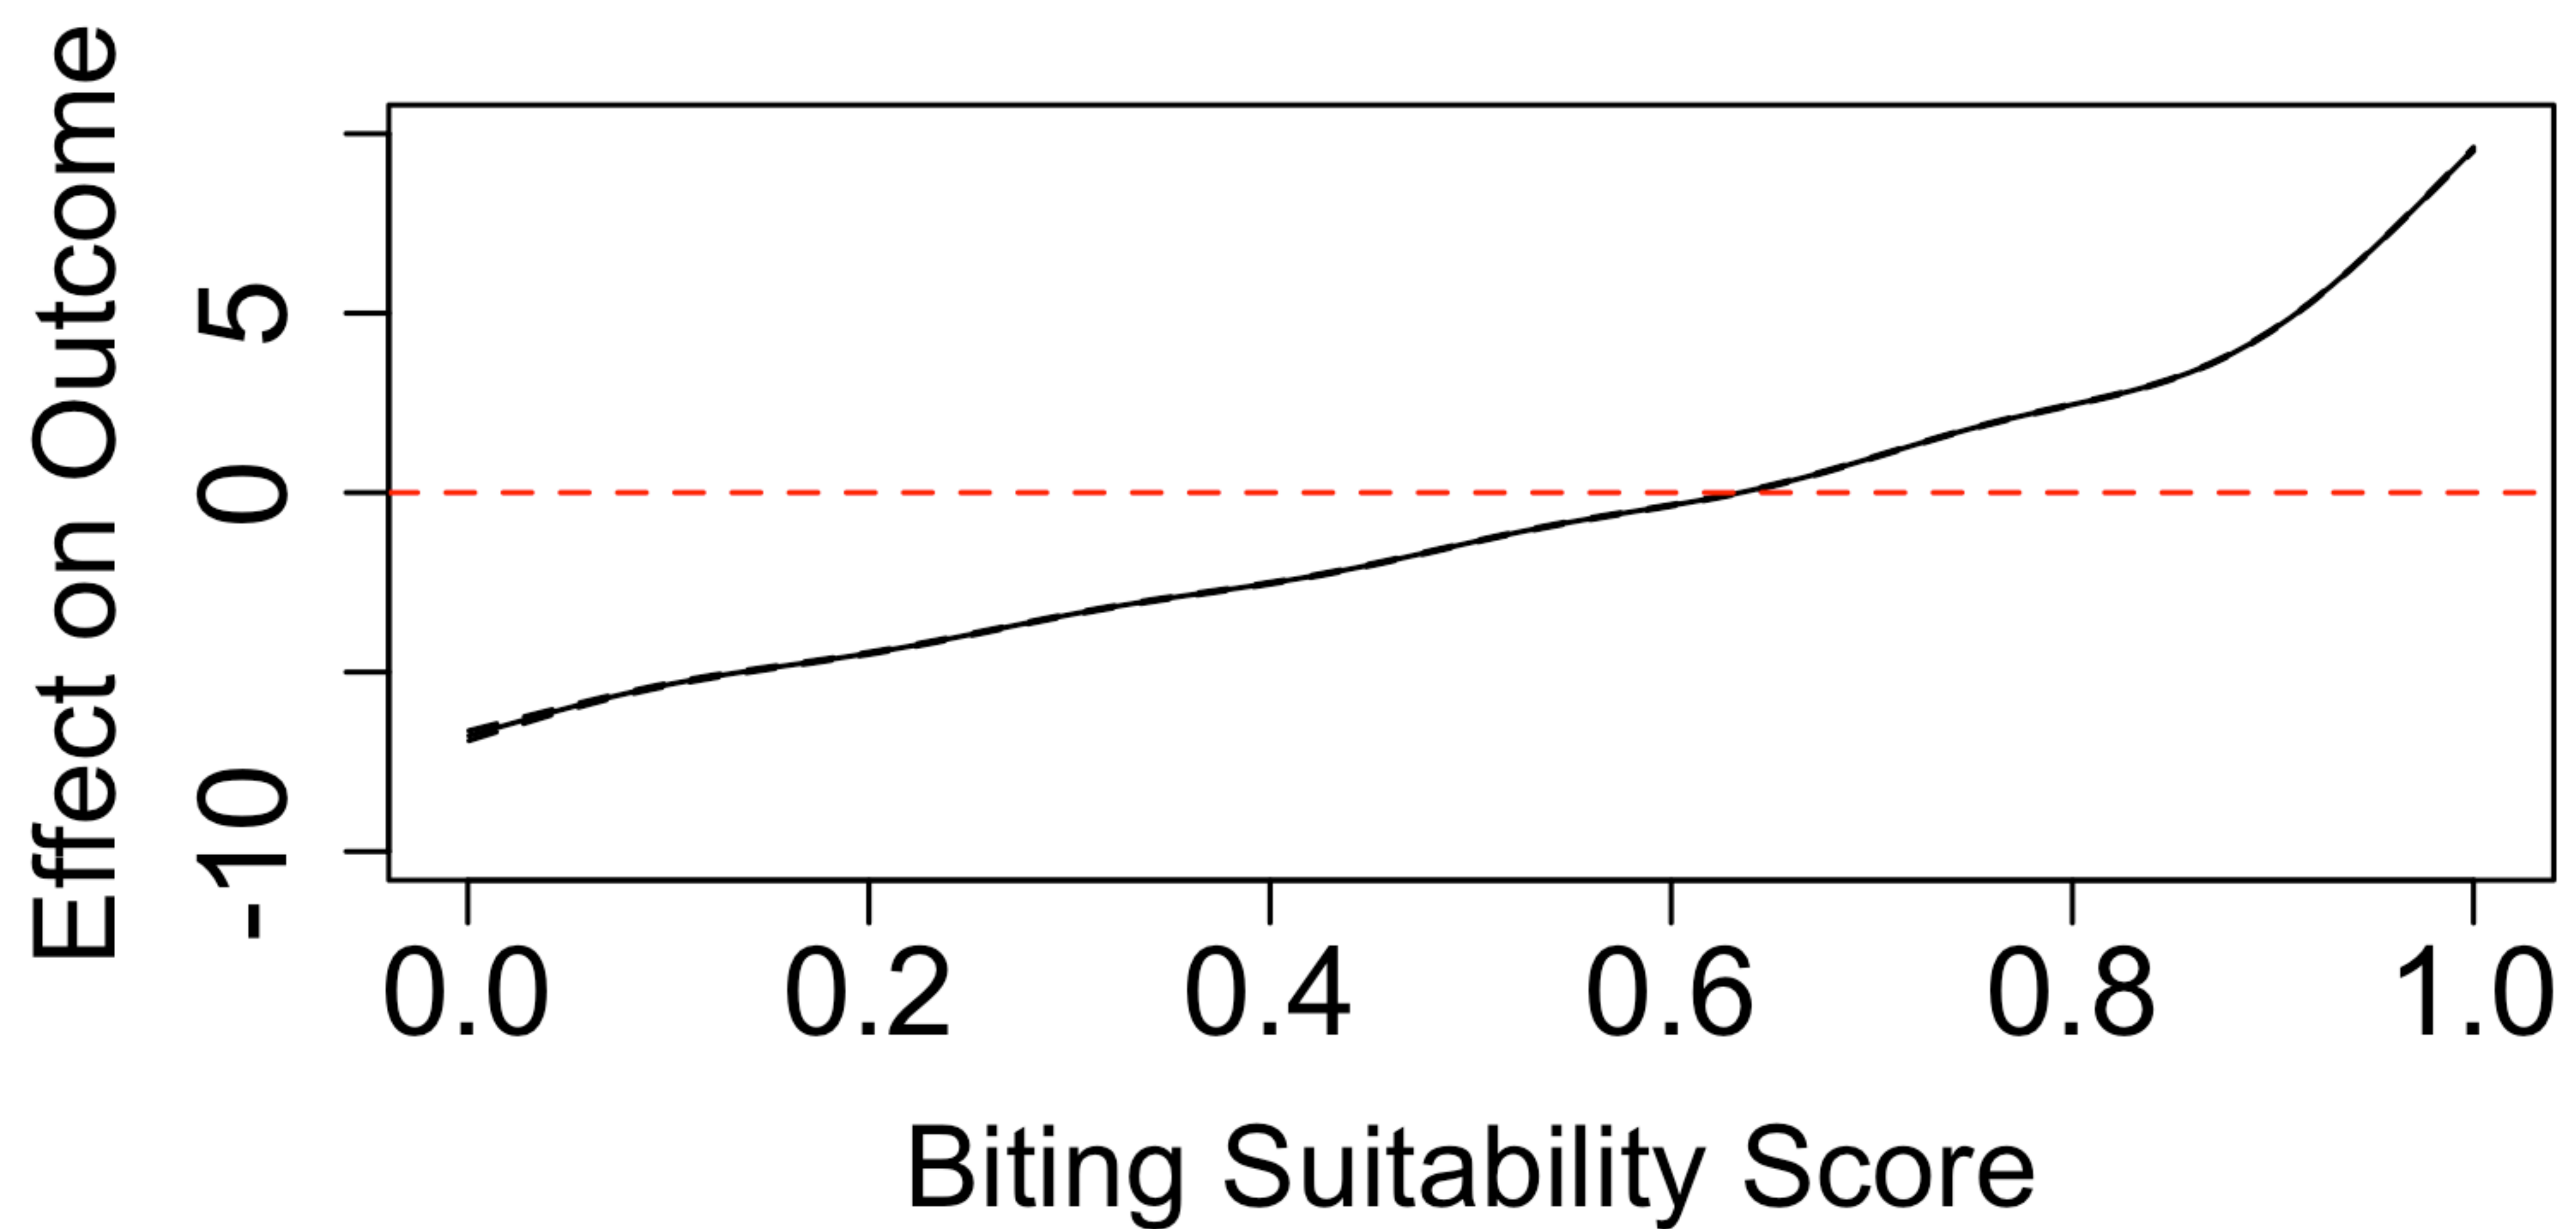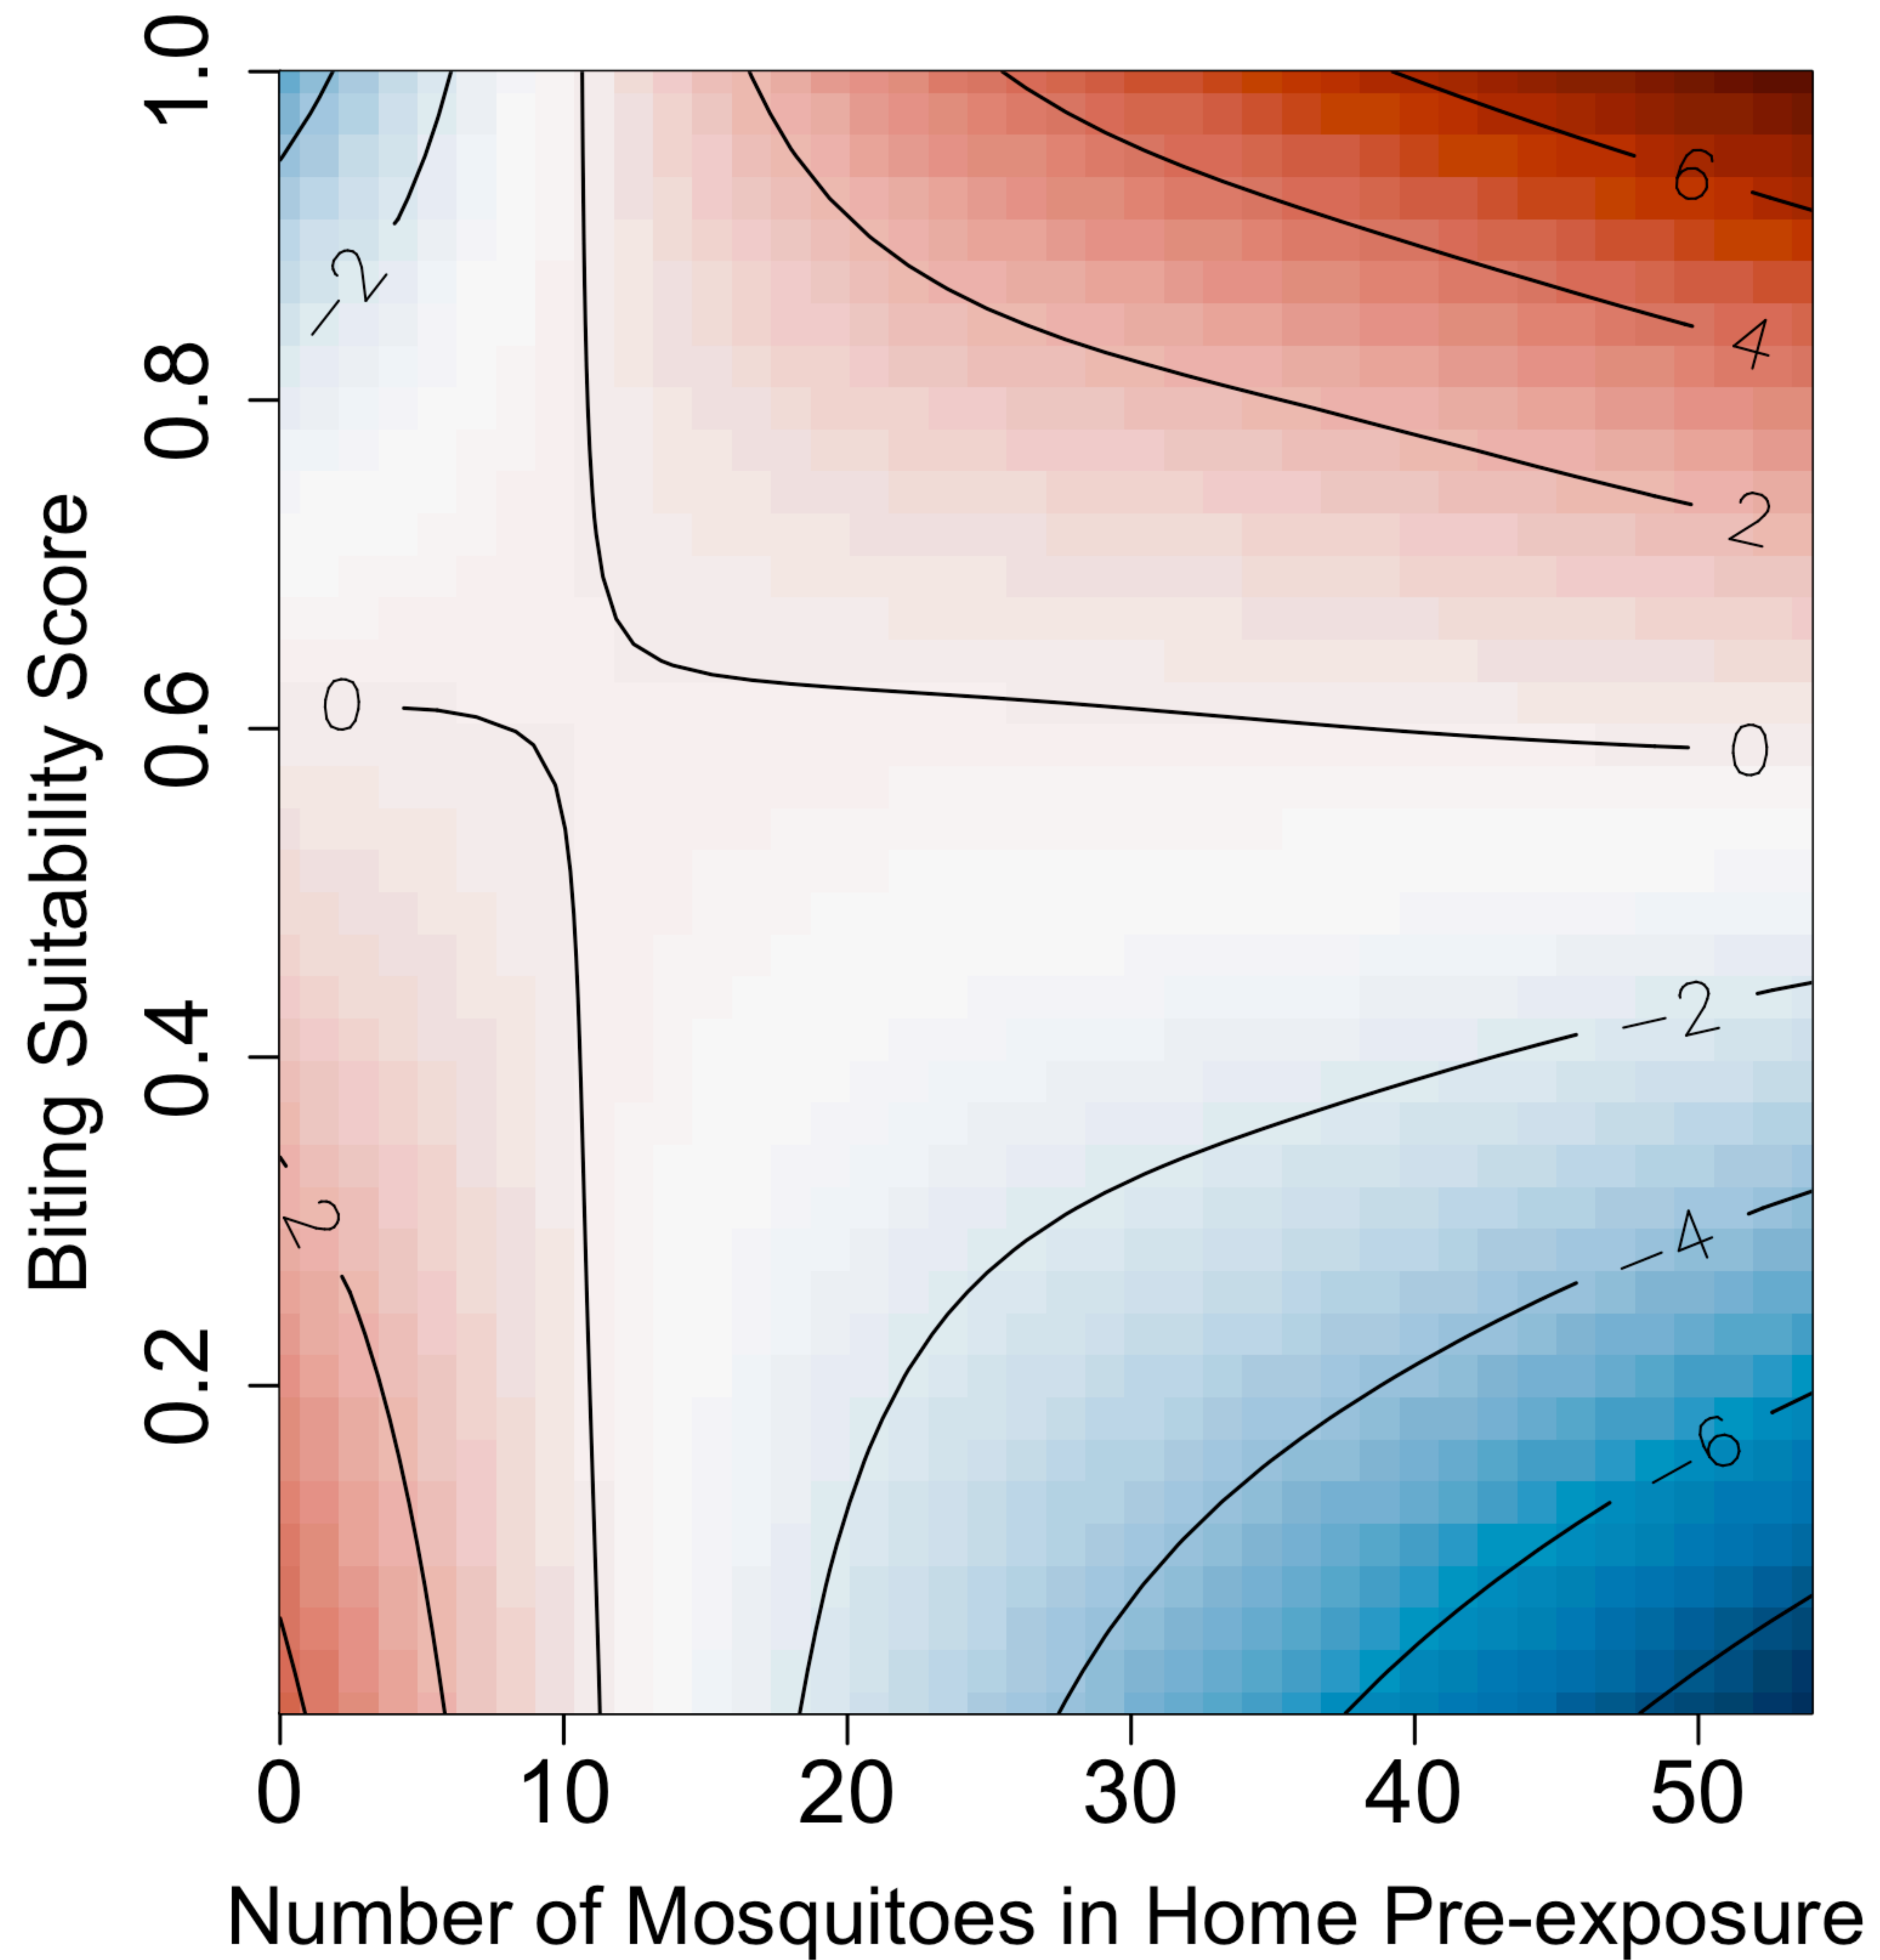

Supplement: pcbi.1008627.s026.pdf [file pcbi.1008627.s026.pdf]
