# Supplementary material for: Disease-driven reduction in human mobility influences human-mosquito contacts and dengue transmission dynamics
Source: PubMed Central journal article supplement (PMC7845972; doi:10.1371/journal.pcbi.1008627), 2021-01-19
Supplement: pcbi.1008627.s030.pdf [file pcbi.1008627.s030.pdf]

Expected Percent Change in Mosquito Contacts

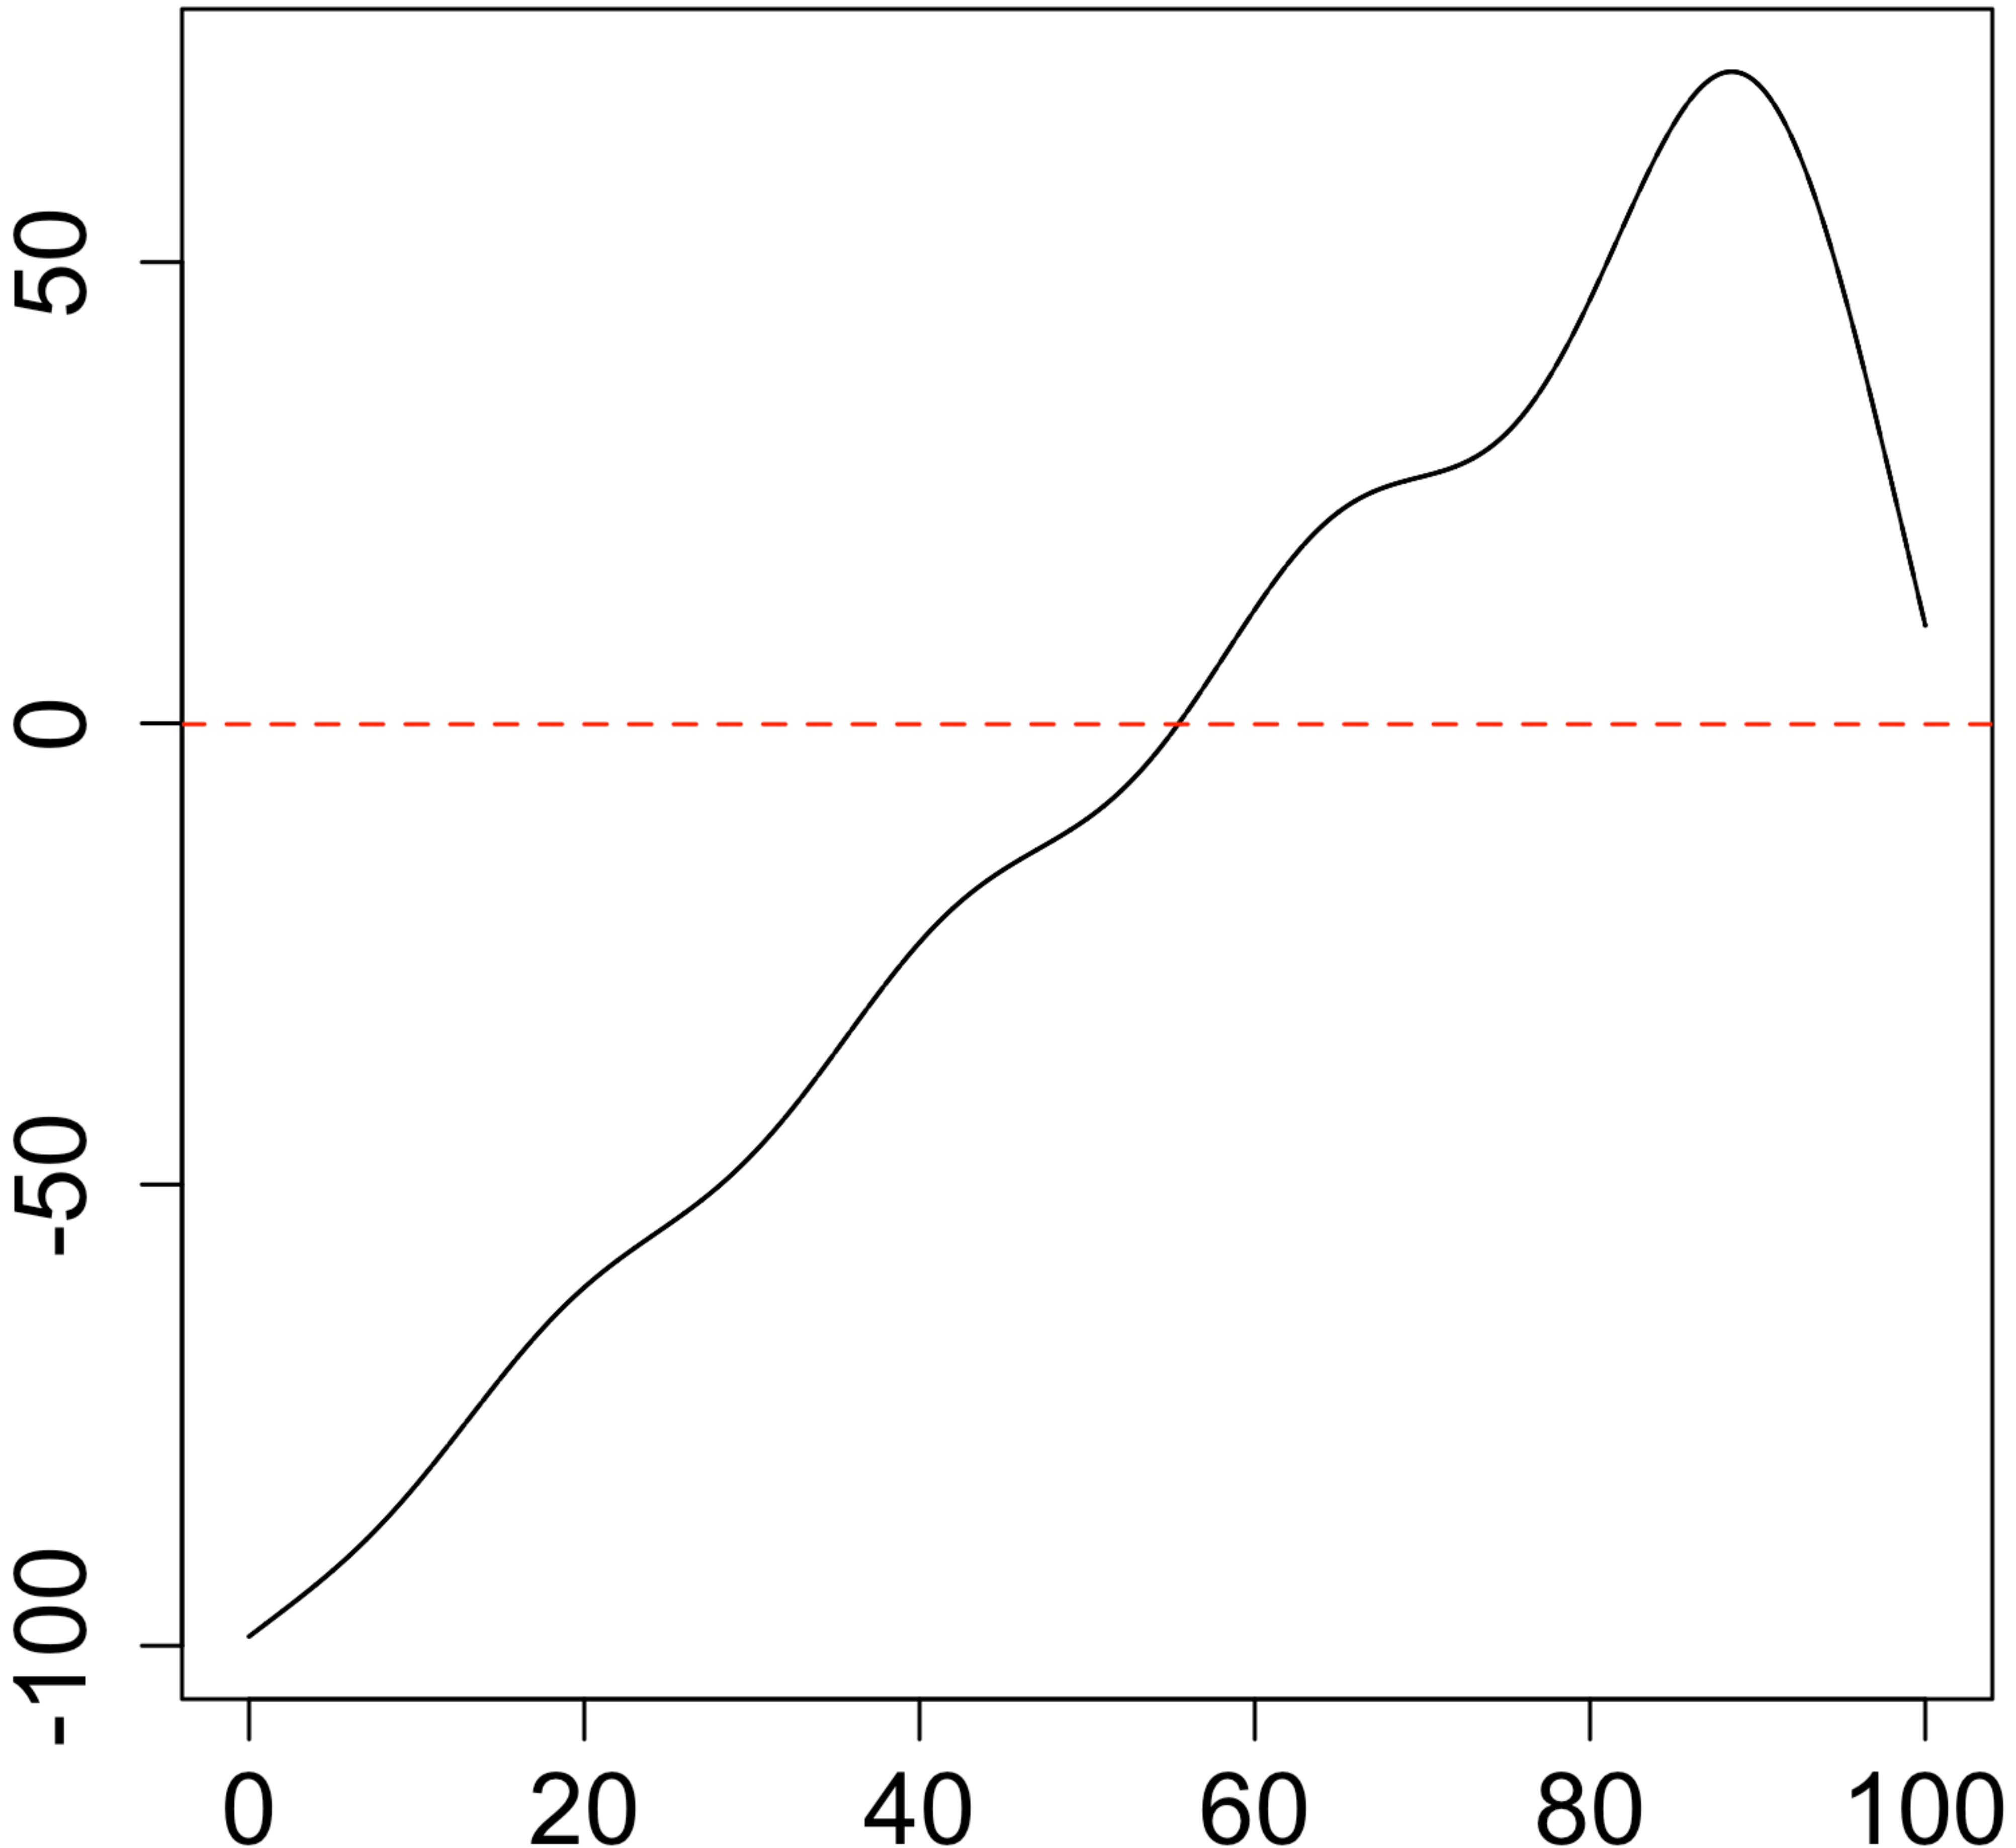

Percent of Bites Expected at Home Pre-exposure
