# Supplementary material for: Disease-driven reduction in human mobility influences human-mosquito contacts and dengue transmission dynamics
Source: PLOS journal article supplement (doi:10.1371/journal.pcbi.1008627), 2021-01-19
Supplement: S16 (10.1371/journal.pcbi.1008627.s016) [file journal.pcbi.1008627.s016]

|                                          | Mean (sd) Onward Transmission |                       | Mean (sd) Change in Onward Transmission with Movement Changes |                          |
|------------------------------------------|-------------------------------|-----------------------|---------------------------------------------------------------|--------------------------|
|                                          | $R_{\text{norm}}$             | $R_{\text{movement}}$ | $R_{\text{abs\_change}}$                                      | $R_{\text{rel\_change}}$ |
| 1° bites at home                         | 2.2 (2.4)                     | 3.8 (3.6)             | 0.7 (0.9)                                                     | 30.4 (19.7)              |
| 1° bites at other houses                 | 2.1 (2.3)                     | 1.4 (1.4)             | -1.3 (1.5)                                                    | -48.4 (21.3)             |
| 2° bites at infectious individual's home | 0.3 (0.4)                     | 0.6 (0.6)             | 0.1 (0.2)                                                     | 25.3 (30.2)              |
| 2° bites elsewhere                       | 4.5 (4.2)                     | 5.0 (3.9)             | -1.0 (2.3)                                                    | -13.5 (25.2)             |
| Total                                    | 5.0 (4.6)                     | 5.7 (4.4)             | -0.8 (1.9)                                                    | -11.2 (25.9)             |
